# Supplementary material for: Glyphosate affects the larval development of honey bees depending on the susceptibility of colonies
Source: PLOS journal article supplement (doi:10.1371/journal.pone.0205074), 2018-10-09
Supplement: S15 (10.1371/journal.pone.0205074.s015) [file journal.pone.0205074.s015]

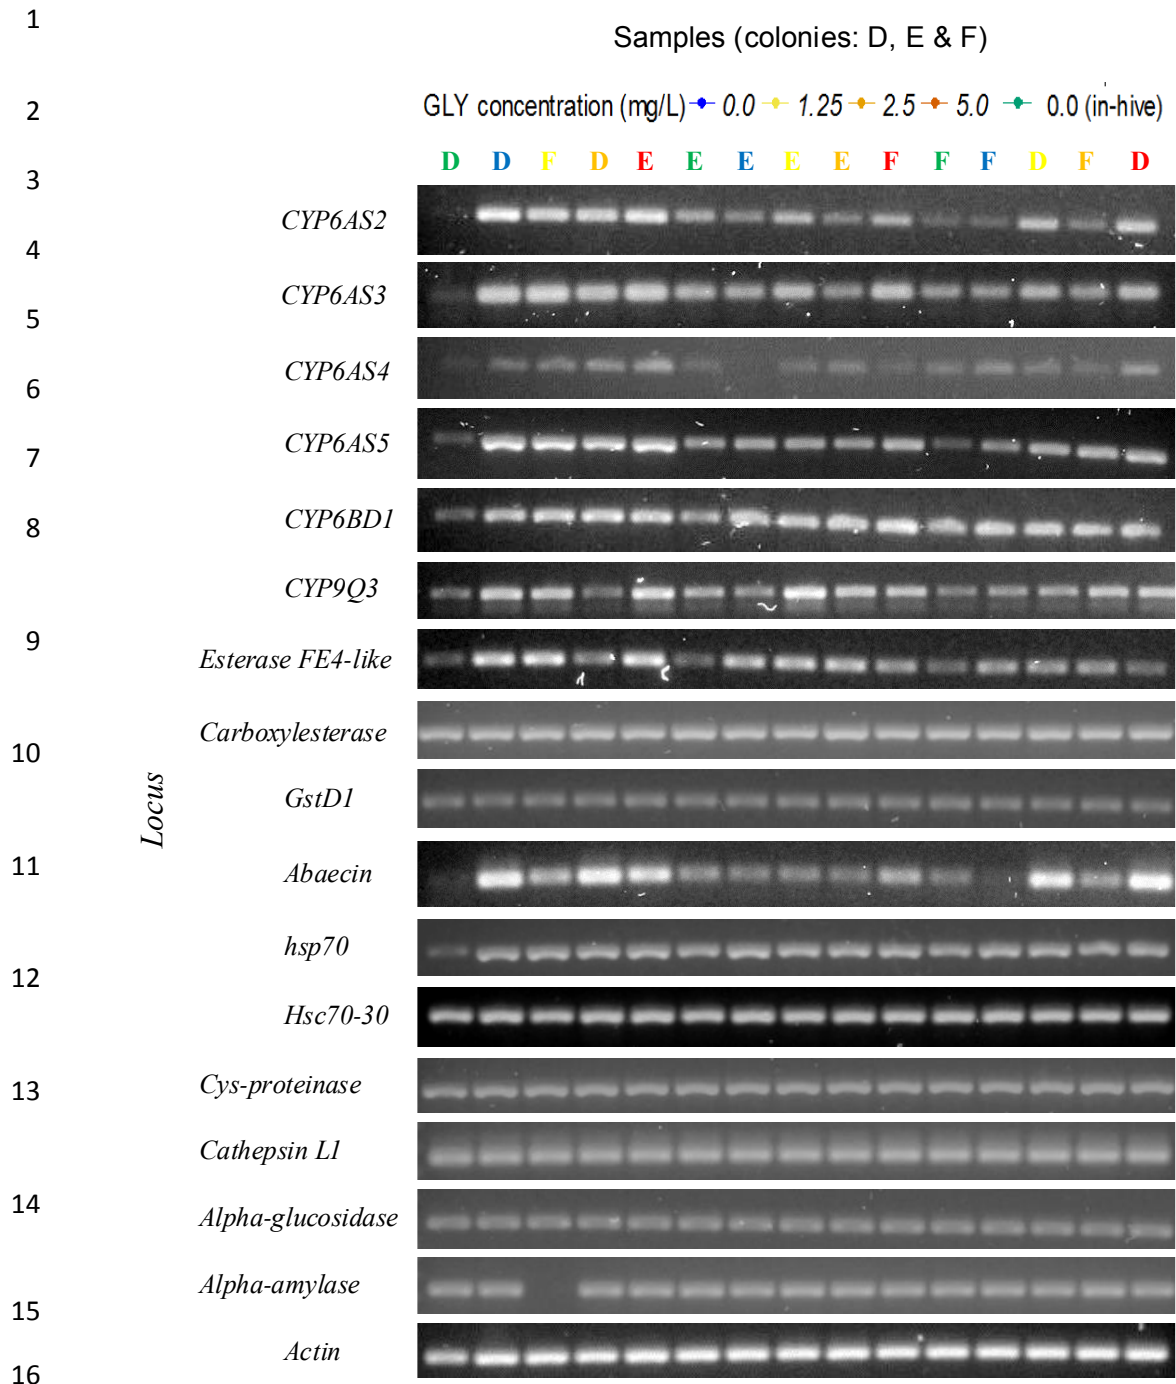

**S4 Fig. Gel electrophoresis of RT-PCR products of the target genes in each larval gut sample.** Pool samples of 10 guts of 5-day-old larvae (reared in-hive or *in vitro*) sampled from three colonies (D, E and F) exposed to different concentrations of glyphosate (1.25-5.0 mg. of GLY per litre of food). One agarose gel was performed for each gene on all samples.
